# Supplementary material for: Treatment-free remission after two-year consolidation therapy with nilotinib in patients with chronic myeloid leukemia: STAT2 trial in Japan
Source: PubMed Central journal article supplement — Haematologica. 2018 Jul 5;103(11):1835–42. doi: 10.3324/haematol.2018.194894 (PMC6278957; doi:10.3324/haematol.2018.194894), 2018-11
Supplement: 2018_194894-Disclosures_and_Contributions.pdf [file 2018_194894-Disclosures_and_Contributions.pdf]

Haematologica  
HAEMATOL/2018/194894  
Version 3

Treatment-free remission after two-year consolidation therapy with nilotinib in patients with chronic myeloid leukemia: STAT2 trial in Japan

Naoto Takahashi, Kaichi Nishiwaki, Chiaki Nakaseko, Nobuyuki Aotsuka, Koji Sano, Chikako Ohwada, Jun Kuroki, Hideo Kimura, Michihide Tokuhira, Kinuko Mitani, Kazuhisa Fujikawa, Osamu Iwase, Kohshi Ohishi, Fumihiko Kimura, Tetsuya Fukuda, Sakae Tanosaki, Saori Takahashi, Yoshihiro Kameoka, Hiroyoshi Nishikawa, and Hisashi Wakita

Disclosures: 1. This study was supported by research funding from Novartis Pharmaceuticals to N.T. 2. N.T reports grants from Novartis Pharmaceuticals, during the conduct of the study; grants and personal fees from Novartis Pharmaceuticals, grants and personal fees from Otsuka, grants and personal fees from Pfizer, personal fees from Bristol-Myers Squibb, outside the submitted work; K.N reports grants from Zenyaku Kogyo Company, Limited, grants from Chugai Pharmaceutical, grants from Novartis Pharma K.K., grants from Kyowa Hakko Kirin Co, Ltd, grants from Nippon Shinyaku Co, Ltd, outside the submitted work; C.N reports personal fees from Novartis, grants and personal fees from Bristol-Myers Squibb, grants and personal fees from Pfizer, grants and personal fees from Takeda pharmaceuticals, grants and personal fees from Kyowa Hakko Kirin, grants and personal fees from Otsuka Pharmaceutical, grants and personal fees from Ono Pharmaceutical, grants and personal fees from Chugai Pharmaceutical, grants and personal fees from Asahi Kasei Pharma, grants and personal fees from Shionogi, personal fees from Shire, personal fees from Janssen, personal fees from Celgene, outside the submitted work; M.T. reports personal fees from Bristol-Myers Squibb, personal fees from Pfizer, outside the submitted work; K.M reports grants from Kyowa Hakko Kirin Co. Ltd., grants from Chugai Pharmaceutical Co. Ltd., grants from Takeda Pharmaceutical Co. Ltd., grants from Novartis Pharma K. K., personal fees from Kyowa Hakko Kirin Co. Ltd., personal fees from Celgene Co., personal fees from Pfizer Inc., personal fees from Alexion Pharmaceuticals Inc., personal fees from BML Inc., personal fees from Shire Japan K.K., personal fees from Bristol-Myers Squibb K.K., personal fees from Abbvie Inc., personal fees from Mochida Pharmaceutical Co. Ltd., personal fees from Novartis Pharma K. K., personal fees from Takeda Pharmaceutical Co. Ltd., personal fees from Kyowa Hakko Kirin Co. Ltd., personal fees from Ono Pharmaceutical Co. Ltd., personal fees from Nippon Shinyaku Co. Ltd., outside the submitted work. H.N reports personal fees from Bristol-Myers Squibb K.K., during the conduct of the study; grants and personal fees from Ono Pharmaceutical Co. Ltd., grants from Bristol-Myers Squibb K.K., grants from Kyowa Hakko Kirin Co. Ltd., grants from Chugai Pharmaceutical Co. Ltd., grants from Pfizer Inc., grants from Asahi Kasei Pharma, grants from Zenyaku Kogyo Company, grants from Taiho Pharma, grants from Daiichi Sankyo Co. Ltd., grants from Sysmex Co. Ltd., outside the submitted work. The other authors declare that they have no conflicts of interest. 3. No patents
